# Supplementary material
Source: PubMed Central journal article supplement (PMC8160928)
Supplement: jamaotolaryngolheadnecksurg-e210930-s001.pdf [file jamaotolaryngolheadnecksurg-e210930-s001.pdf]

## Supplemental Online Content

Staibano P, Levin M, McHugh T, Gupta M, Sommer DD. Association of tracheostomy with outcomes in patients with COVID-19 and SARS-CoV-2 transmission among health care professionals: a systematic review and meta-analysis. *JAMA Otolaryngol Head Neck Surg*. Published online May 27, 2021. doi:10.1001/jamaoto.2021.0930

**eAppendix.** Ovid search strategy for MEDLINE (using PubMed)

**eTable.** Summary of included studies (n = 69)

This supplemental material has been provided by the authors to give readers additional information about their work.

| <b>eAppendix. Ovid search strategy</b>                                                                                                                                                                                                                                                                                                                                                                                                                                                                                                                                                                                                                                                                                                                                 |                |
|------------------------------------------------------------------------------------------------------------------------------------------------------------------------------------------------------------------------------------------------------------------------------------------------------------------------------------------------------------------------------------------------------------------------------------------------------------------------------------------------------------------------------------------------------------------------------------------------------------------------------------------------------------------------------------------------------------------------------------------------------------------------|----------------|
| <b>Search strategy</b>                                                                                                                                                                                                                                                                                                                                                                                                                                                                                                                                                                                                                                                                                                                                                 | <b>Results</b> |
| <p>1. (COVID-19 or COVID or SARS-CoV-2 or coronavirus or coronavirus disease 2019).tw. or (critically ill or ICU or ARDS or acute respiratory distress syndrome or ventilated or ventilation or invasive ventilation or mechanical ventilation).tw. or critically ill.kf. or ventilators, mechanical.kf. or respiratory distress syndrome.kf. or coronavirus.kf. or COVID-19.kf. or severe acute respiratory syndrome coronavirus 2.kf.</p>                                                                                                                                                                                                                                                                                                                            | 665522         |
| <p>2. (tracheo?tomy or open tracheo?tomy or surgical tracheo?tomy or elective tracheo?tomy or awake tracheo?tomy or emergent tracheo?tomy or emergency tracheo?tomy or percutaneous tracheo?tomy or percutaneous dilatational tracheo?tomy or bedside tracheo?tomy).tw. or tracheostomy.kf. or tracheotomy.kf. or dilatation.kf.”</p>                                                                                                                                                                                                                                                                                                                                                                                                                                  | 73494          |
| <p>3. (overall survival or survival or weaning or ventilation-weaning or decannulation or tracheo?tomy decannulation or perioperative complications or complications).tw. or (antibody titres or antibody titers or antibod* or antibody levels or antibody positivity or serology or serological testing).tw. or (house staff or surgeons or surgical team or attending surgeon or physicians or nurses or nursing staff or scrub nurse or healthcare worker transmission or healthcare worker infection or ICU care or ICU or critical care or timing of tracheostomy or timing or timing from intubation or sedation weaning).tw. or mortality.kf. or perioperative period.kf. or surgeons.kf. or COVID-19 diagnostic testing.kf. or serology.kf. or nurses.kf.</p> | 6247416        |

|                                                                            |     |
|----------------------------------------------------------------------------|-----|
| 1 AND 2 AND 3 AND limit to humans AND<br>2020–present AND limit to English | 964 |
|----------------------------------------------------------------------------|-----|
